# Supplementary material
Source: PubMed Central journal article supplement (PMC5563676)
Supplement: 12264_2015_1533_MOESM1_ESM.pdf [file 12264_2015_1533_MOESM1_ESM.pdf]

## SUPPLEMENTARY MATERIAL

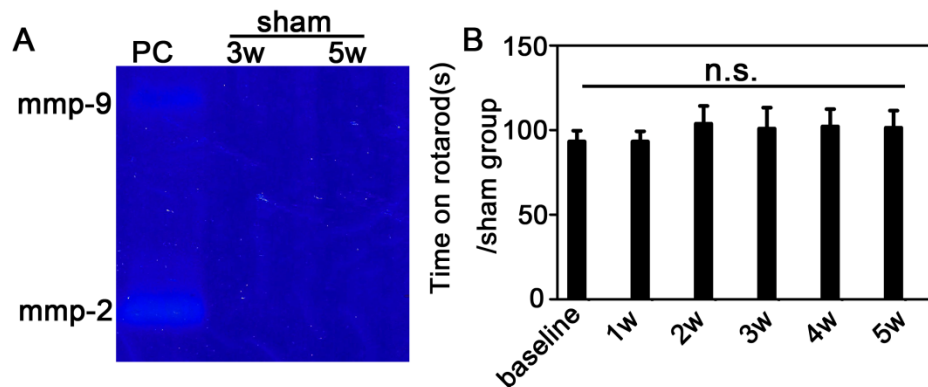

**Supplementary Fig. 1. Zymogram and rotarod assay of the sham mice.**

**(A)** Zymogram detected no MMP-9 and MMP-2 activities in mice at 3 and 5 weeks after sham operation. PC: positive control (mouse MMP-9 and MMP-2 protein mixtures). **(B)** Time on rotarod for mice of sham group at baseline and 1 to 5 weeks after tMCAO. n.s.= no significance.
